# Supplementary material
Source: publisher figshare collection journal article supplement (https://plos.figshare.com/ndownloader/files/14542259)
Supplement: Supplementary file [file 14542259]

**S1 Table. Study sites and years.** Survey years for parks and ponds included in a field study of presence/absence of California Red-legged Frogs (CRLF; *Rana draytonii*) and American Bullfrogs (BF; *Lithobates catesbeianus*) in Central California. Includes presence of large anuran species, either *R. draytonii* (CRLF), *L. catesbeianus* (BF), both present (both), or neither (none).

|                                              |                | CRLF/BF  |                        |
|----------------------------------------------|----------------|----------|------------------------|
| Park                                         | Pond           | Presence | Years Surveyed         |
| Blue Oak Ranch Reserve,<br>Santa Clara Co.   |                |          |                        |
|                                              | Big Lake       | BF       | 2013, 2014             |
|                                              | Cabin          | Both     | 2013, 2014             |
|                                              | West           | BF       | 2013, 2014             |
|                                              | Windmill       | CRLF     | 2013, 2014             |
| Frog Pond Wetland Preserve,<br>Monterey Co.  |                |          |                        |
|                                              | Del Monte Lake | None     | 2013, 2014             |
|                                              | Frog Pond      | None     | 2013, 2014, 2015, 2016 |
|                                              | Laguna Grande  | None     | 2013, 2014             |
|                                              | Lake El Estero | None     | 2013, 2014             |
|                                              | Monterey Pines | None     | 2013, 2014             |
|                                              | Roberts Lake   | None     | 2013, 2014             |
| Garland Ranch Regional Park,<br>Monterey Co. |                |          |                        |

|                                            |      |                        |
|--------------------------------------------|------|------------------------|
| Fern                                       | Both | 2013, 2014, 2015, 2016 |
| Mesa                                       | BF   | 2013, 2014, 2015, 2016 |
| Veeder                                     | CRLF | 2013, 2014, 2015, 2016 |
| Henry Coe State Park,<br>Santa Clara Co.   |      |                        |
| C-24                                       | None | 2016                   |
| C-25                                       | Both | 2016                   |
| C-26                                       | BF   | 2016                   |
| C-27                                       | None | 2016                   |
| C-30                                       | CRLF | 2016                   |
| C-35                                       | CRLF | 2016                   |
| C-41                                       | CRLF | 2016                   |
| C-43                                       | CRLF | 2016                   |
| C-44                                       | CRLF | 2016                   |
| C-59                                       | CRLF | 2016                   |
| C-60                                       | Both | 2016                   |
| C-62                                       | Both | 2016                   |
| C-67                                       | Both | 2016                   |
| C-68                                       | BF   | 2016                   |
| C-76                                       | CRLF | 2016                   |
| Palo Corona Regional Park,<br>Monterey Co. |      |                        |
| Animas                                     | CRLF | 2013, 2014, 2015, 2016 |

|                                             |      |                        |
|---------------------------------------------|------|------------------------|
| Boundary                                    | none | 2013, 2014, 2015, 2016 |
| Dead Pig                                    | CRLF | 2013, 2014, 2015, 2016 |
| Entrance                                    | both | 2013, 2014, 2015, 2016 |
| Roadrunner                                  | none | 2013, 2014, 2015, 2016 |
| Salamander                                  | CRLF | 2013, 2014, 2015, 2016 |
| River                                       | CRLF | 2015, 2016             |
| Pinnacles National Park,<br>San Benito Co.  |      |                        |
| BGR                                         | CRLF | 2013, 2014             |
| Point Reyes National Seashore,<br>Marin Co. |      |                        |
| Estero Pond                                 | CRLF | 2013                   |
| Estero Trailhead                            | CRLF | 2013                   |
| Five Brooks                                 | both | 2013                   |
| Giacomini 1                                 | CRLF | 2013                   |
| Giacomini 2                                 | CRLF | 2013                   |
| Haigmeir                                    | BF   | 2013                   |
| Marshall Beach                              | CRLF |                        |
| Trailhead                                   |      | 2013                   |
| Mud Lake                                    | both | 2013                   |
| Olema Hill                                  | both | 2013                   |
| Olema Marsh                                 | both | 2013                   |

|                                       |             |      |                  |
|---------------------------------------|-------------|------|------------------|
|                                       | Tomales Bay | BF   |                  |
|                                       | Trailhead   |      | 2013             |
| Santa Lucia Preserve,<br>Monterey Co. |             |      |                  |
|                                       | GR Pond     | CRLF | 2013, 2014, 2015 |
|                                       | LG-15       | BF   | 2013, 2014, 2015 |
|                                       | LG-16       | BF   | 2013, 2014, 2015 |
|                                       | LG-17       | CRLF | 2013, 2014, 2015 |
|                                       | LG-18       | BF   | 2013, 2014, 2015 |
|                                       | LG-19       | both | 2013, 2014, 2015 |
|                                       | LG-20       | both | 2013, 2014, 2015 |
|                                       | LG-21       | CRLF | 2013, 2014, 2015 |
|                                       | LG-22       | BF   | 2013, 2014, 2015 |
|                                       | LG-23       | both | 2013, 2014, 2015 |
|                                       | LG-24       | BF   | 2013, 2014, 2015 |
|                                       | PO-01       | CRLF | 2013, 2014, 2015 |
|                                       | PO-02       | CRLF | 2013, 2014, 2015 |
|                                       | PO-03       | CRLF | 2013, 2014, 2015 |
|                                       | PO-04       | CRLF | 2013, 2014, 2015 |
|                                       | PO-05       | CRLF | 2013, 2014, 2015 |
|                                       | PO-06       | none | 2013, 2014, 2015 |
|                                       | RO-10       | CRLF | 2013, 2014, 2015 |
|                                       | RO-11       | CRLF | 2013, 2014, 2015 |

|                                            |      |                  |
|--------------------------------------------|------|------------------|
| RO-12                                      | CRLF | 2013, 2014, 2015 |
| RO-13                                      | CRLF | 2013, 2014, 2015 |
| RO-14                                      | both | 2013, 2014, 2015 |
| SC-25                                      | BF   | 2013, 2014, 2015 |
| SC-26                                      | both | 2013, 2014, 2015 |
| SC-27                                      | CRLF | 2013, 2014, 2015 |
| SJ-08                                      | CRLF | 2013, 2014, 2015 |
| SJ-09                                      | none | 2013, 2014, 2015 |
| Wilder Ranch State Park,<br>Santa Cruz Co. |      |                  |
| Ag Pond                                    | CRLF | 2013, 2014       |
| Dimeo                                      | CRLF | 2013, 2014       |
| RR1                                        | CRLF | 2013, 2014       |
| RR2                                        | CRLF | 2013, 2014       |
| RR3                                        | CRLF | 2013, 2014       |

6

7

8
